# Supplementary material for: Gene expression during the formation of resting spores induced by nitrogen starvation in the marine diatom Chaetoceros socialis
Source: Springer Nature journal article supplement (doi:10.1186/s12864-023-09175-x), 2023-03-10
Supplement: MOESM1 [file 12864_2023_9175_MOESM1_ESM.pdf]

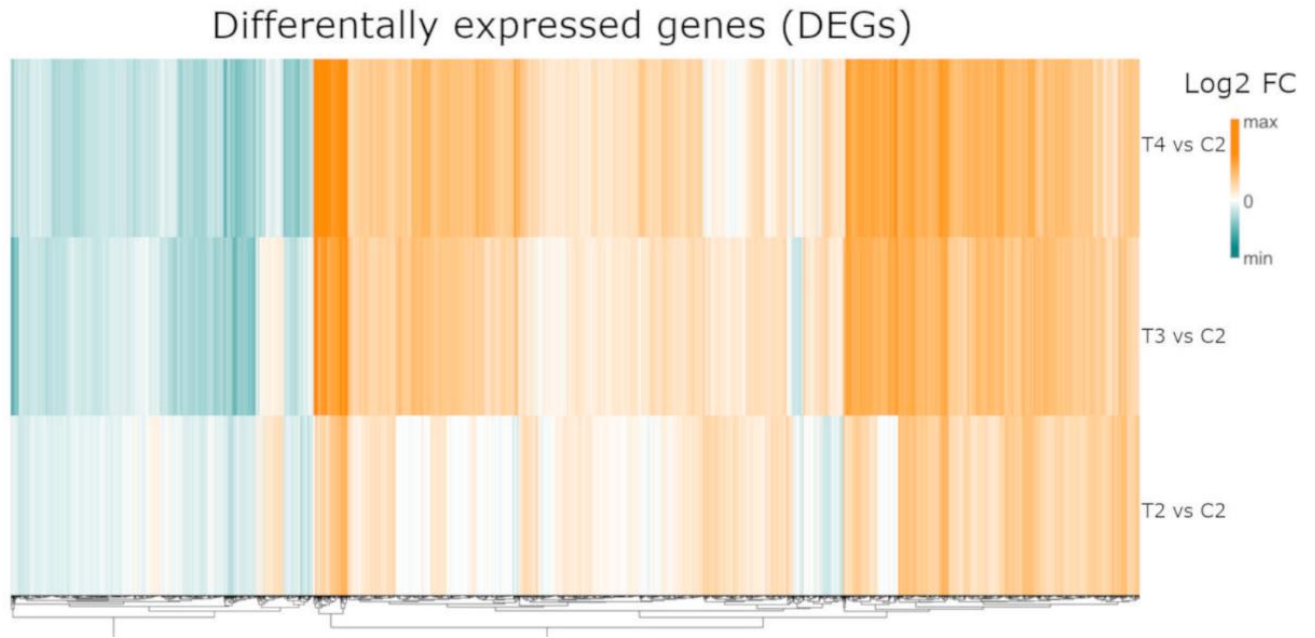

**Figure S1:** Hierarchical clustering analysis of log<sub>2</sub>(FC)s expression. The heatmap represents genes displaying statistical significance ( $\log_2(\text{FC}) \geq 1.5$ , adjusted P-value  $\leq 0.05$ ) for differential expression between treatments (T2, T3, T4) versus control (C2). The up-regulated genes are reported in orange, the down-regulated genes in blue, and the genes not differentially expressed in white.
